# Supplementary material
Source: PubMed Central journal article supplement (PMC4041217)

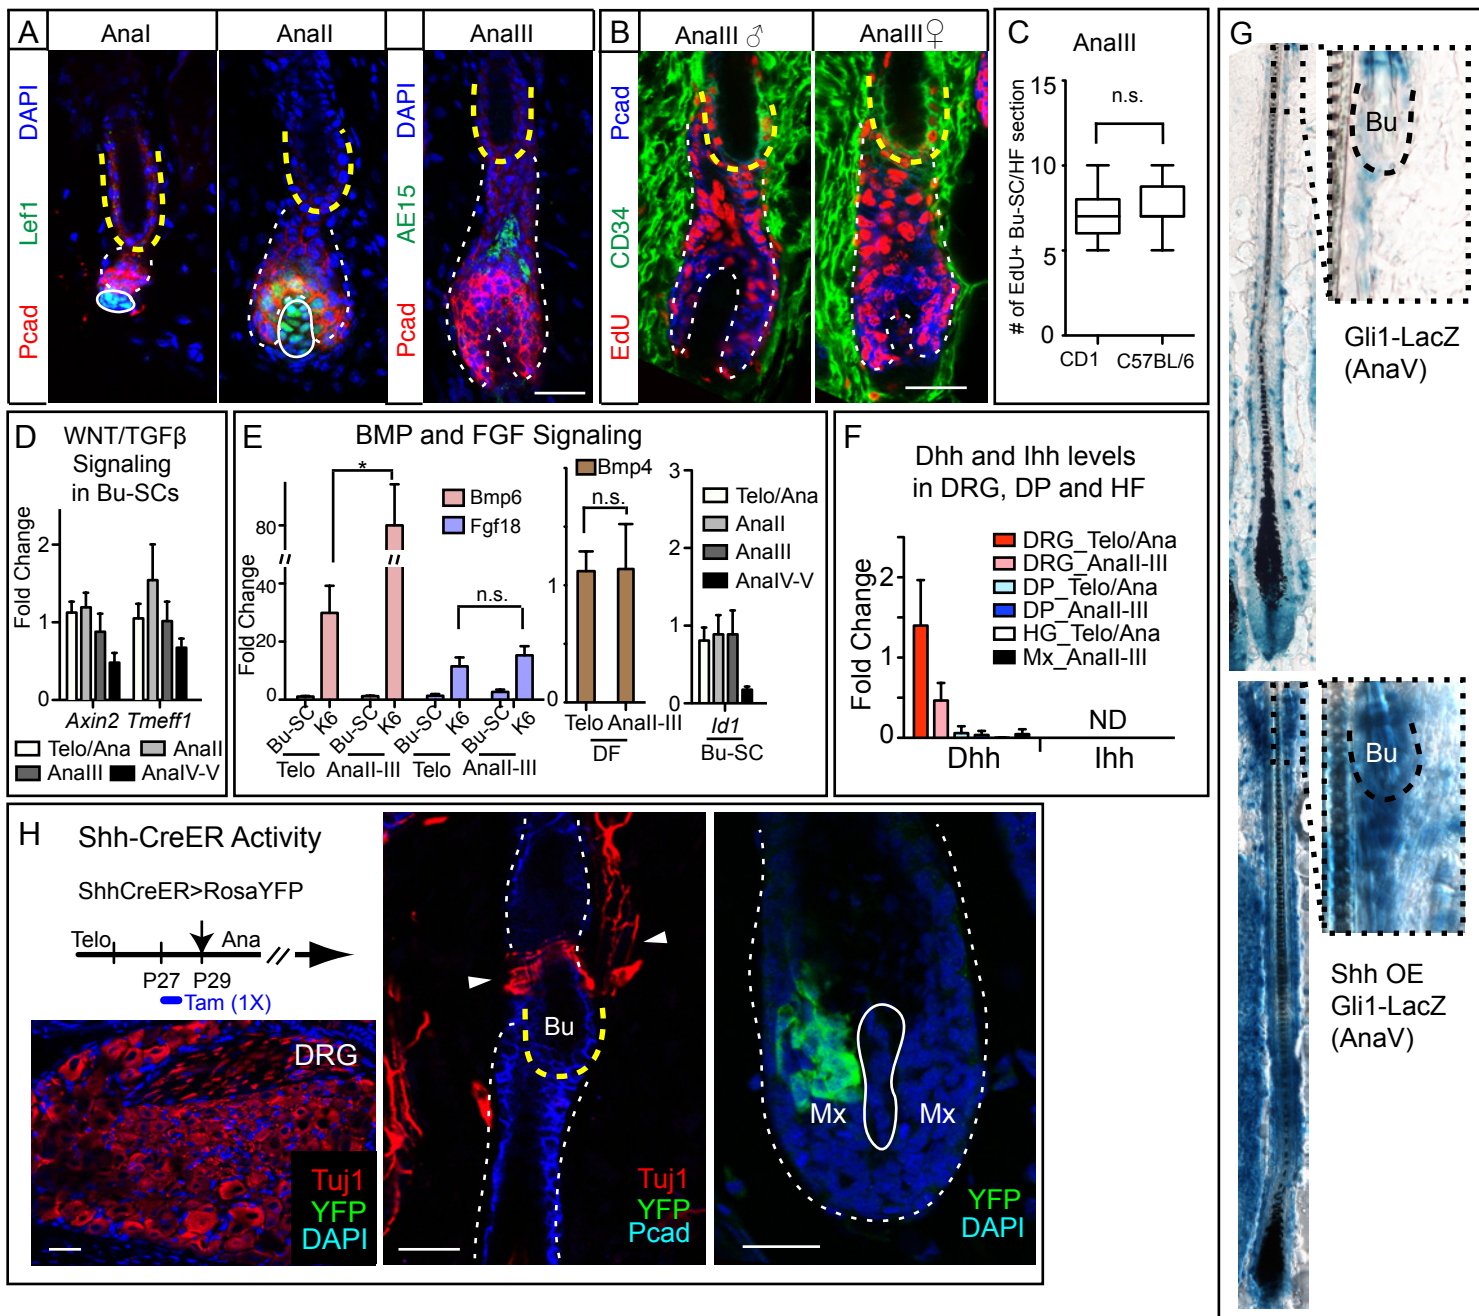

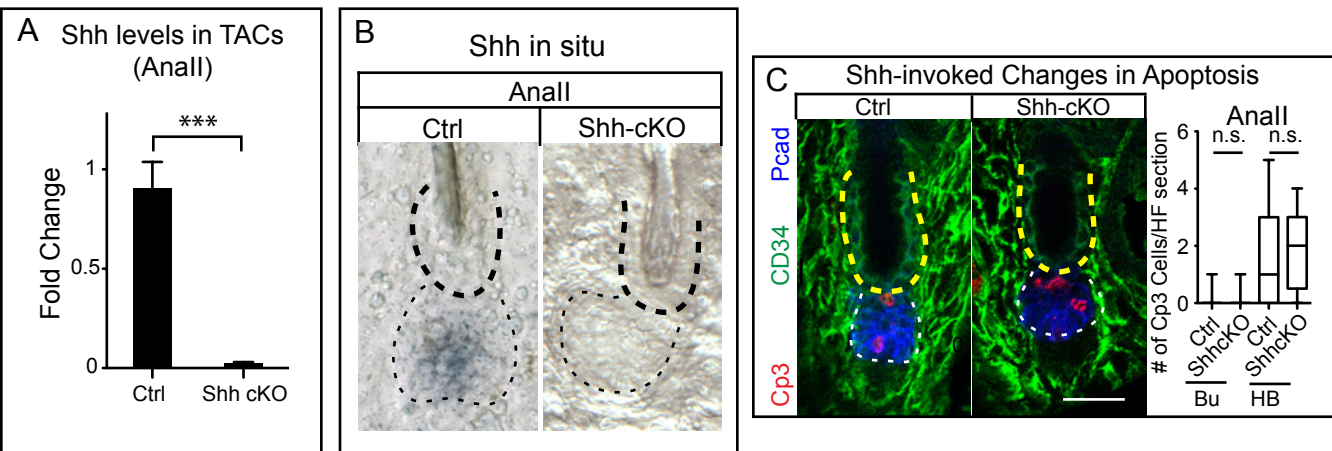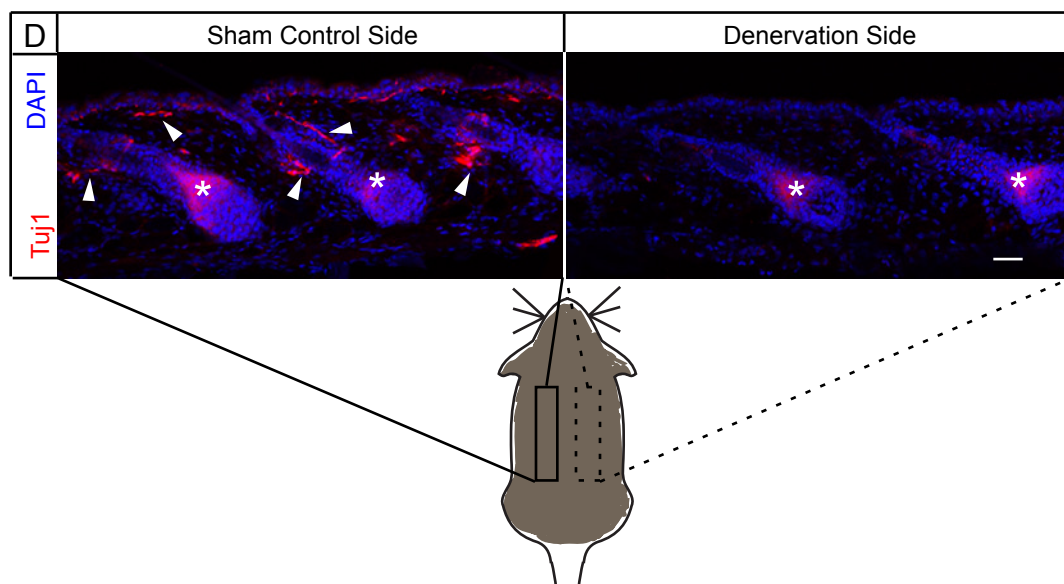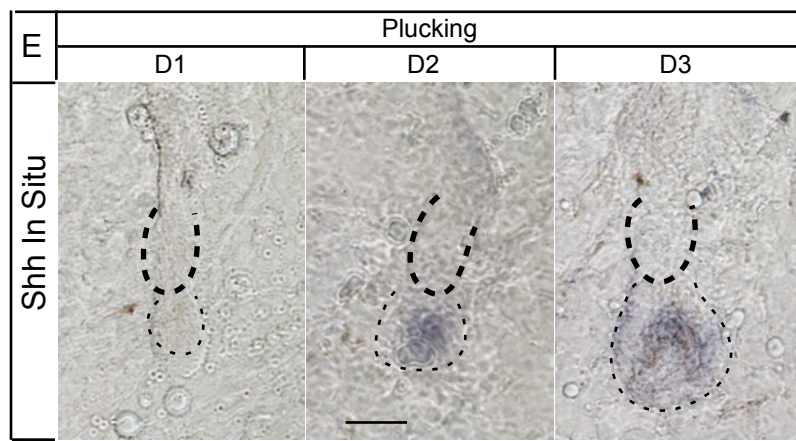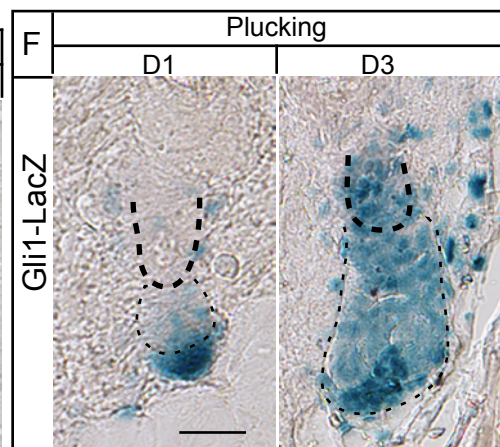

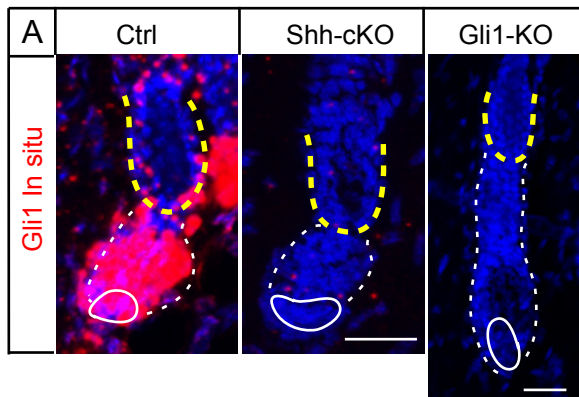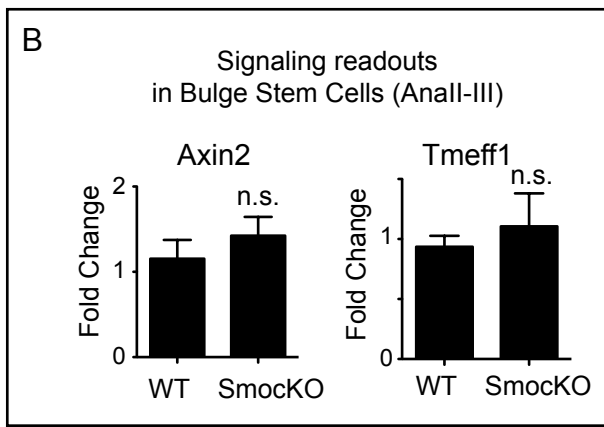



A

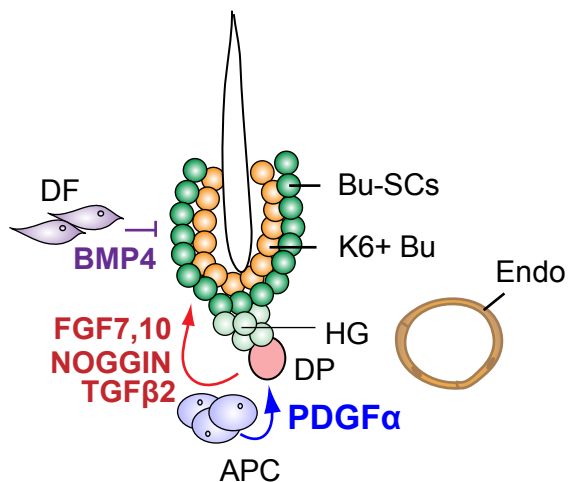

| Cell Type        | Sorting Strategy                                  |
|------------------|---------------------------------------------------|
| DP               | CD140a+, CD29+, CD45-, CD31-, CD34-, Sca1-, CD24- |
| DF               | CD140a+, CD29+, CD45-, CD31-, CD34+, Sca1+, CD24- |
| APC              | CD29+, CD45-, CD31-, CD34+, Sca1+, CD24+          |
| Endothelial cell | CD31+                                             |

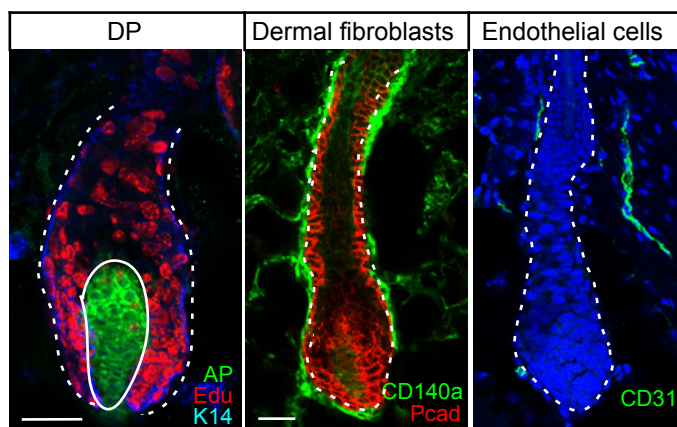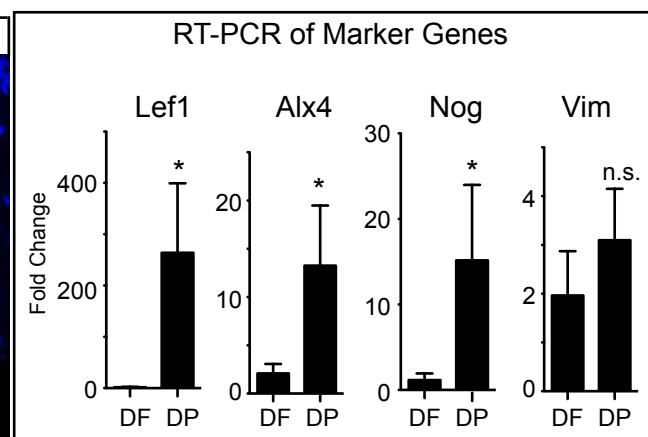

B

Shh-invoked changes in Dermal factors (Anall-III)

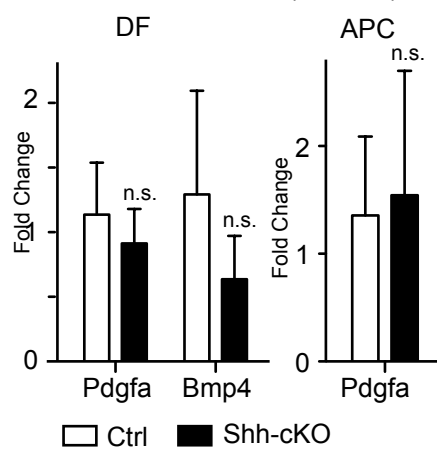

C

Smo-cKO    Gli2-cKO

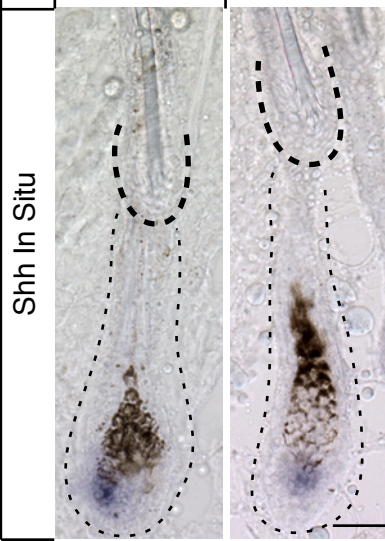

D

Ctrl    Gli2-cKO    Smo-cKO

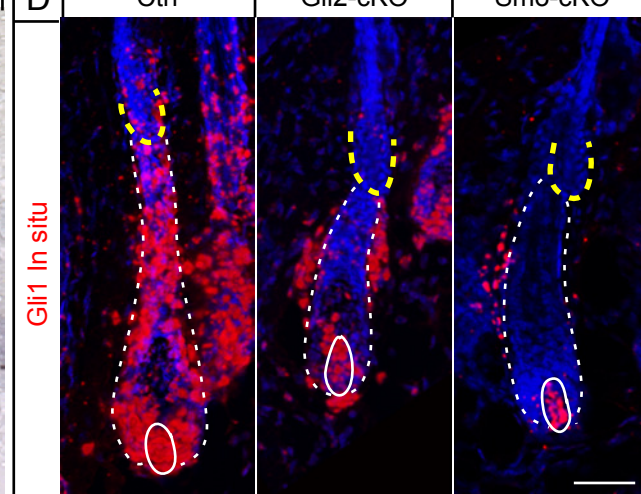

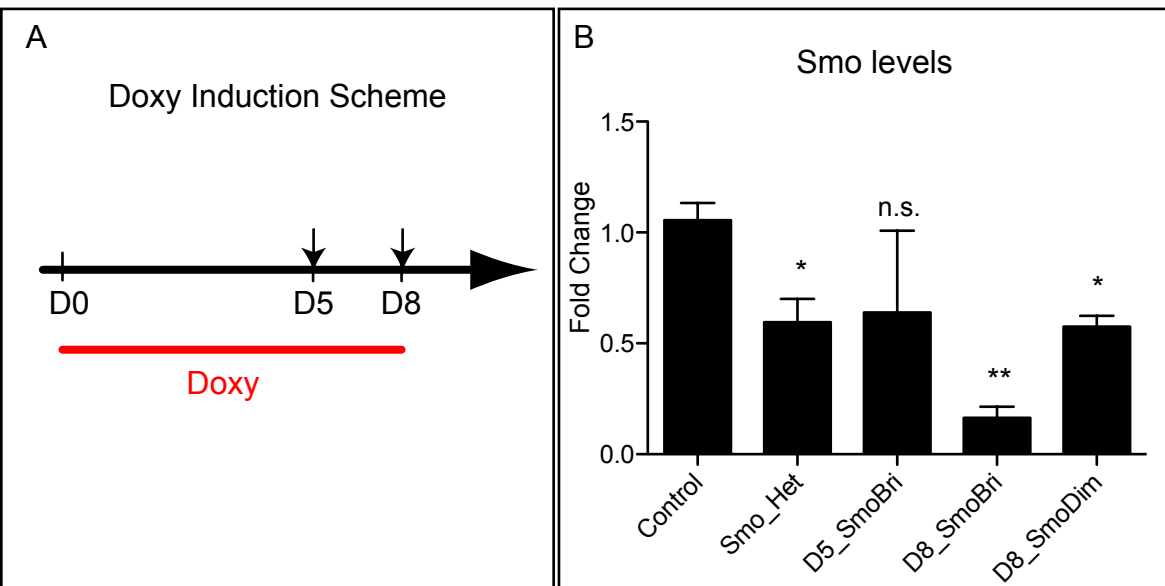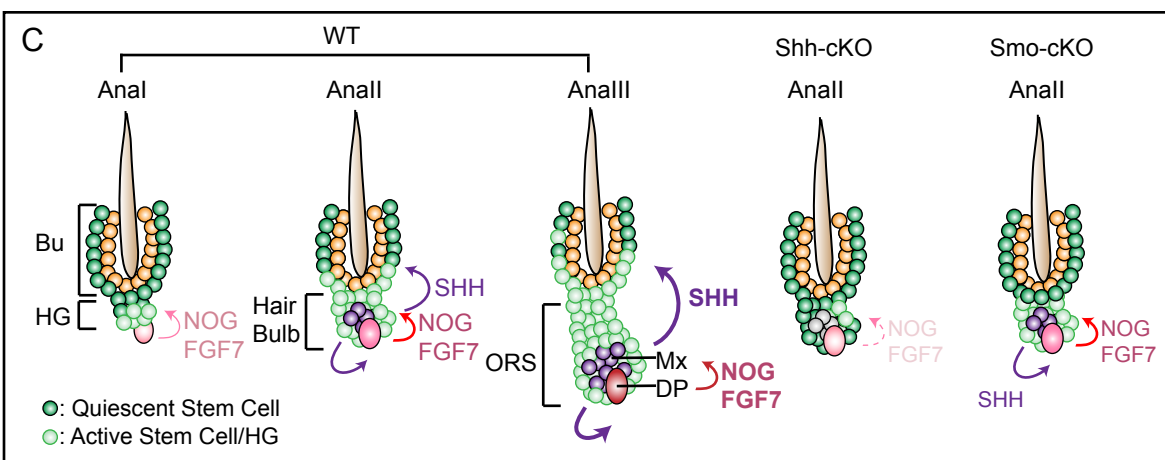

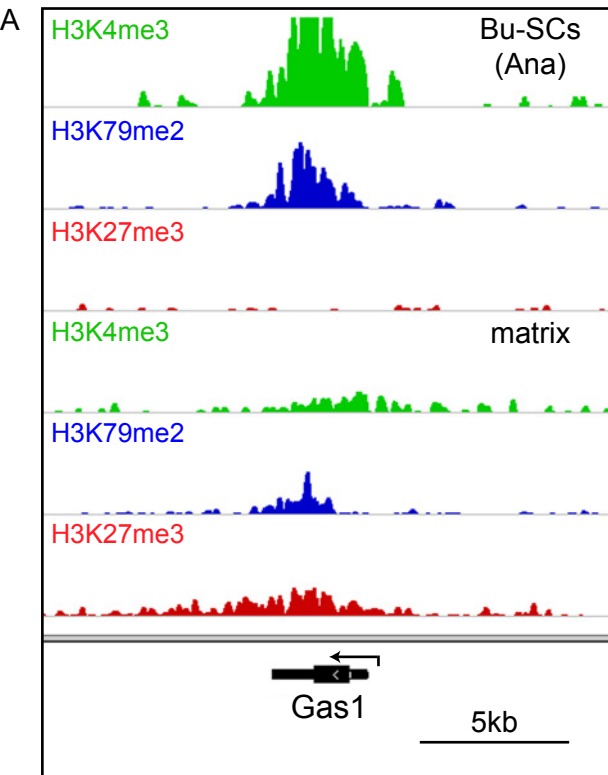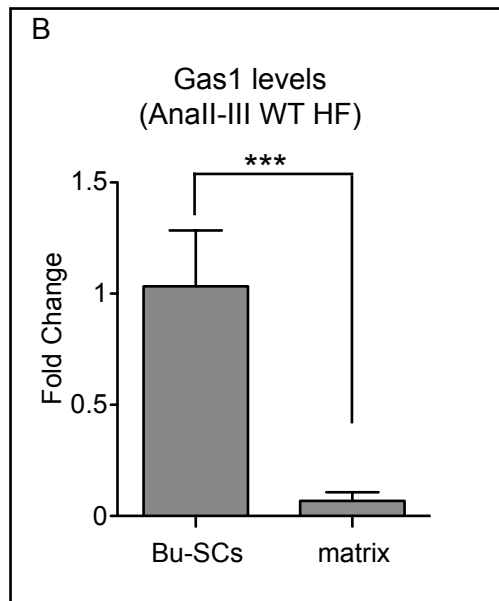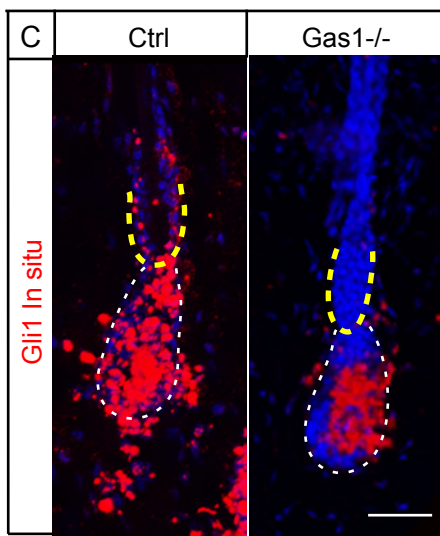

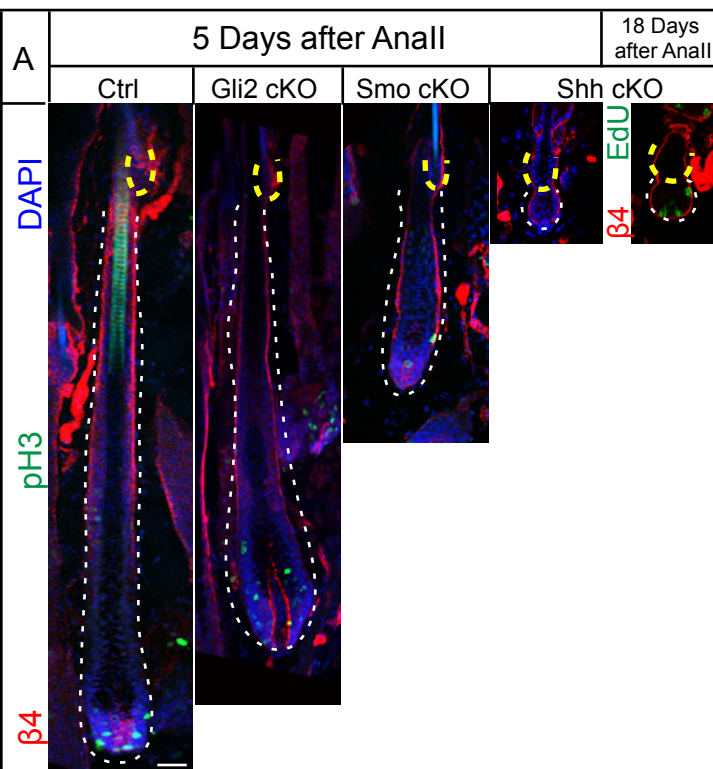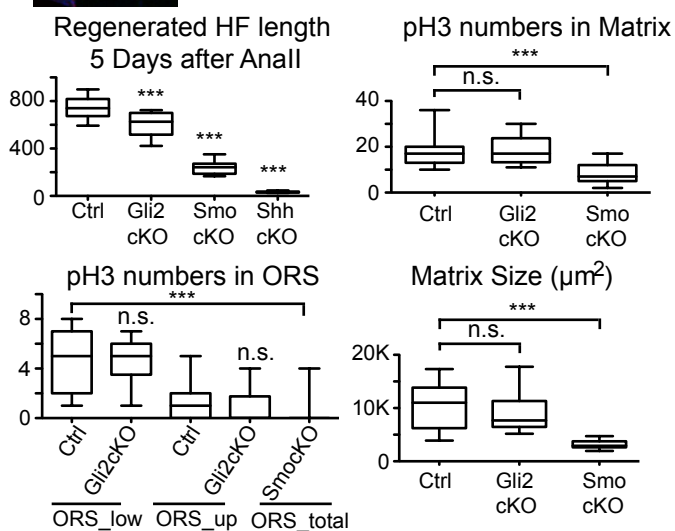

Hair Coat Recovery (Shaved at P21)

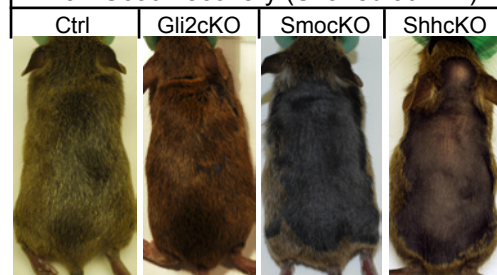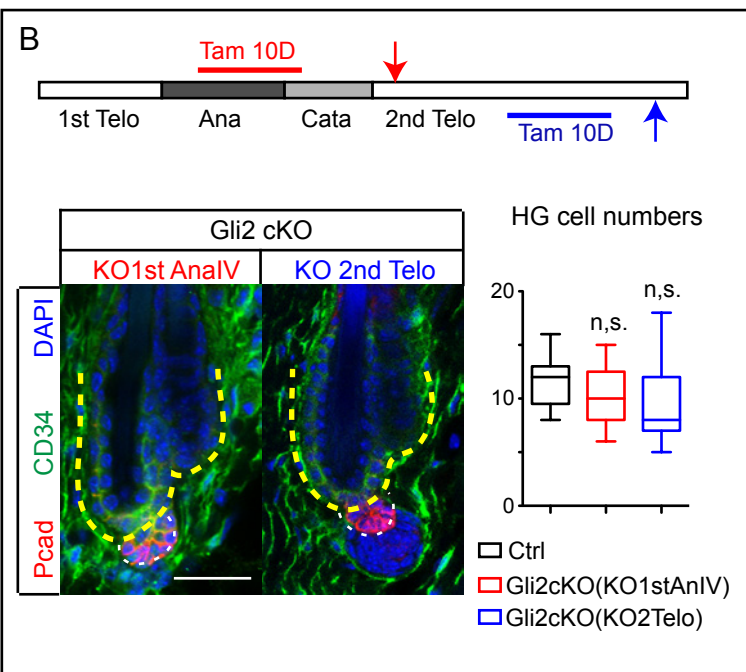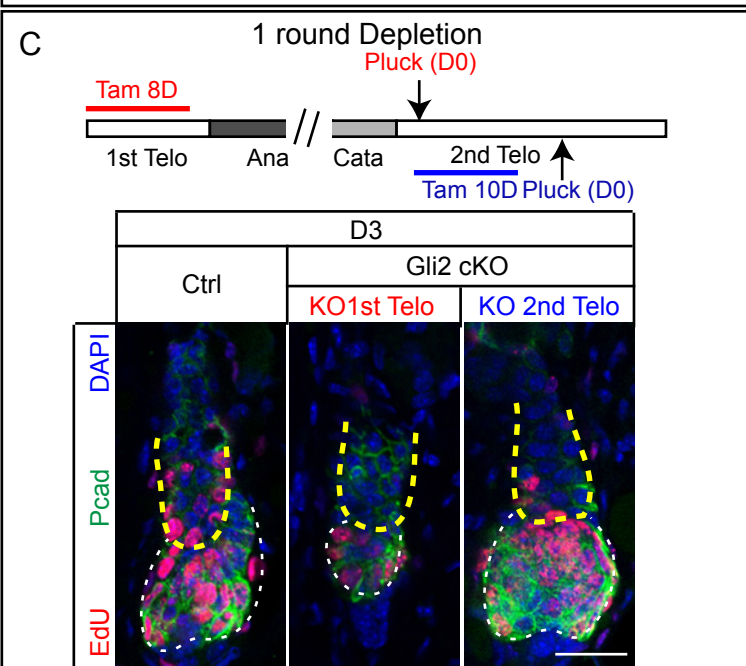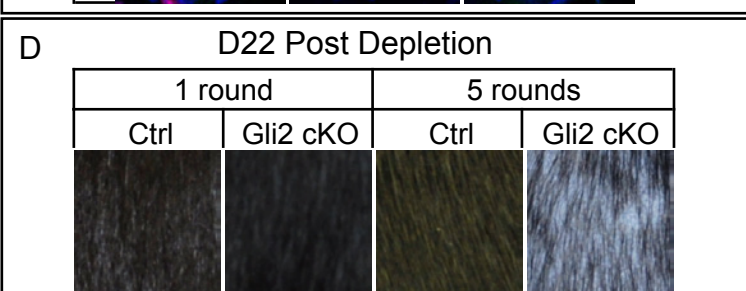

Supplement: NIHMS583114-supplement-02.pdf [file NIHMS583114-supplement-02.pdf]
